# Supplementary material
Source: PubMed Central journal article supplement (PMC2660747)
Supplement: 0810637106_0810637106SI.pdf [file 0810637106_0810637106SI.pdf]

# Supporting Information

Asner et al. 10.1073/pnas.0810637106

## SI Materials and Methods

**Remote-Sensing System.** Large-scale analysis of forest 3-D structure and biological composition requires a combination of advanced airborne imaging technologies that simultaneously resolve the horizontal and vertical characteristics of the vegetation, as well as the type of vegetation. No airborne (or space-based) technologies were available to make these simultaneous measurements, so we developed the CAO, a new system designed specifically for mapping the biochemical, taxonomic, and structural properties of vegetation and ecosystems (<http://cao.stanford.edu>) (1). The CAO combines 3 major instrument subsystems—HiFIS, waveform LiDAR scanner, and global positioning system—inertial measuring unit (GPS-IMU)—into a single airborne package.

The CAO HiFIS subsystem provides spectroscopic images of the land surface. The CAO-Alpha configuration uses a pushbroom imaging array with 1500 cross-track pixels, with sampling done across the 367–1058 nm range at a spectral resolution of up to 2.4 nm. The spectrometer subsystem is fully integrated with a waveform LiDAR subsystem with an adjustable laser pulse repetition rate of up to 100 kHz (1). The GPS-IMU subsystem provides 3-D positioning and attitude data for the sensor package on board the aircraft, allowing for highly precise and accurate projection of HiFIS and LiDAR observations on the ground (1). The CAO-Alpha configuration provides coaligned HiFIS and LiDAR data at a spatial resolution of 0.4–1.0 m, depending on the aircraft's altitude above the ground.

**Airborne Data Collection.** In April–May 2008, we operated the CAO-Alpha system over KNP. The CAO-Alpha data were collected at 1,000 m above ground level, providing combined HiFIS and LiDAR measurements at a spatial resolution of 56 cm. All flights were conducted within 2.5 h of solar noon. For this study, the airborne data were collected over 790 ha of herbivore enclosure-exclosure areas and an additional 850 ha of surrounding savanna region.

**Data Processing and Analysis.** Fusion of the imaging spectroscopy and LiDAR data requires a processing stream that maximizes the sharing of information between data products. Given the enormous data volumes involved, the processing stream must be highly automated. Fig. S2 shows the processing stream for this study, in which raw spectral, laser, and trajectory data are integrated and analyzed in a series of higher-order products and results. The following sections briefly describe the major steps in the process.

**Aircraft Positioning.** The CAO uses in-flight and postflight data integration approaches to precisely match HiFIS and LiDAR data in 3-D space. The in-flight step is achieved by providing a common mount with measured offsets between instrument optical centers, as well as time-stamping of spectral and LiDAR data collection streams with shared position and trajectory data. The LiDAR has a custom-designed laser beam divergence to precisely match the field of view of the CAO-Alpha spectrometer. The GPS-IMU data provide the common link for the detailed ray-tracing of the photons between aircraft sensors and the ground. The point-for-point alignment of the LiDAR and HiFIS data are complicated by inherent differences in the scanning geometries of the 2 systems and further distortions of the ground sampling grid due to topography. Our approach is to recover the best estimates for each pixel center location in 3 dimensions for both the LiDAR and HiFIS data (1), then use

these pixel centers to render the 2 data sets into a single, integrated grid of HiFIS and LiDAR data for subsequent processing, analysis, and product generation.

**LiDAR Data Processing.** The GPS-IMU data are combined with the laser ranging data to determine the 3-D location of the laser returns. From the laser “point cloud” data, a physical model is used to estimate top-of-canopy and ground surfaces [digital elevation models (DEMs)], using the REALM (Optech) and Terrascan/Terramatch (Terrasolid) software packages. Vegetation height is then estimated by differencing the top-of-canopy and ground surface DEMs (2, 3).

**HiFIS Data Processing.** The HiFIS data are converted to at-sensor radiances by applying radiometric corrections developed during sensor calibration in the laboratory. Apparent surface reflectance is then derived from the radiance data using an automated atmospheric correction model (ACORN 5LiBatch; Imspec). Inputs to the atmospheric correction algorithm include ground elevation (from the LiDAR), aircraft altitude (from GPS-IMU), solar and viewing geometry, atmosphere type (e.g., tropical), and estimated visibility (in km). The code uses a MODTRAN look-up table to correct for Rayleigh scattering and aerosols. Water vapor is estimated directly from the 940-nm water vapor feature in the radiance data.

Once the HiFIS and LiDAR data have been prepared, the spectral images are masked based on illumination conditions between the sensors and canopies (Fig. S2). The LiDAR and GPS-IMU data provide 3-D maps of precise illumination conditions on each canopy, allowing for the automatic identification and masking of shaded portions of the vegetation.

The masked HiFIS images are passed to an automated spectral mixture analysis model, AutoMCU (4). This algorithm uses spectroscopic signatures to quantify the fractional cover of PV, NPV, and bare substrate within each image pixel, and Monte Carlo unmixing to derive mean estimates of fractional cover along with standard deviation and root mean squared error data on a per-pixel basis.

**Landscape Stratification.** Savanna landscapes are heterogeneous systems in both space and time (5, 6), so careful consideration must be given to landscape stratification for analysis purposes. Catenal development (7), whereby soil and vegetation associations vary down slope, is evident throughout much of KNP (8). The distinction between the nutrient-poor sandy soils of the upland positions and the more nutrient-rich clay soils of the lowland positions provides an ecologically meaningful basis upon which to dissect the landscape.

High-resolution (56 cm) DEMs, derived from the LiDAR data, were used in conjunction with available soil maps (KNP GIS database; <http://www.sanparks.org/parks/kruger/conservation/scientific/gis/gisrsdataview.php>) to delineate upland and lowland patch types at each site in both protected and accessible areas. From within each of these patches, the most comparable areas of similar size were selected based on topography. Comparisons between the herbivore exclusion treatments and the accessible areas at each site were conducted on a patch-specific basis.

At Nkukulu and Letaba, 2 different enclosure types are present: full enclosure, consisting of mesh fencing that excludes all herbivores larger than hares, and partial enclosure, consisting of 2 strands of wire that exclude only elephants and giraffes. For the purposes of this analysis, only the full enclosures were sampled with their respective accessible areas, because these are more









**Table S1. Descriptions of 4 large-scale herbivore treatments in KNP**

| Site         | Age, years | Ecosystem              | Substrate | Precipitation,<br>mm year <sup>-1</sup> | Area, ha   | Fire return interval since<br>establishment, years |
|--------------|------------|------------------------|-----------|-----------------------------------------|------------|----------------------------------------------------|
| Nwashitsumbe | 41*        | Northern plains        | Basalt    | 425                                     | 230 (302)* | 4.0 <sup>†</sup>                                   |
| Hlangwine    | 36         | Southern hills         | Granite   | 625                                     | 220        | 3.6 <sup>†</sup>                                   |
| Nkuhlu       | 6          | Sabie River hillslope  | Granite   | 525                                     | 139        | n/a <sup>‡</sup>                                   |
| Letaba       | 6          | Letaba River hillslope | Granite   | 475                                     | 129        | n/a <sup>‡</sup>                                   |

\*The Nwashitsumbe enclosure was extended by 72 ha into the lowland habitat in 1986, providing a total of 302 ha for our analysis.

<sup>†</sup>Calculated from the KNP GIS database (<http://www.sanparks.org/parks/kruger/conservation/scientific/gis/gisrsdataview.php>)

<sup>‡</sup>A portion of Nkuhlu was burned in 2002 and 2007, but this portion was excluded from the study, leaving the analysis without fire as a covariate. Letaba has not been burned since the treatment was established in 2002.

**Table S2. Height of woody canopies across the 4 treatment landscapes in both lowland and upland topographic positions in KNP**

| Site                            |         | Protected,<br>m | Accessible,<br>m |
|---------------------------------|---------|-----------------|------------------|
| Long-term basalt (Nwashitsumbe) | Upland  | 2.6 ± 2.1       | 1.7 ± 1.2        |
|                                 | Lowland | 3.3 ± 1.7       | 1.6 ± 1.4        |
| Long-term granite (Hlangwine)   | Upland  | 3.9 ± 2.0*      | 3.9 ± 2.2*       |
|                                 | Lowland | 3.4 ± 2.5*      | 3.4 ± 2.5*       |
| Short-term granite (Nkuhlu)     | Upland  | 3.5 ± 2.3       | 3.0 ± 2.1        |
|                                 | Lowland | 3.1 ± 2.2       | 3.0 ± 2.0        |
| Short-term granite (Letaba)     | Upland  | 2.2 ± 1.3*      | 2.2 ± 1.1*       |
|                                 | Lowland | 4.6 ± 2.8       | 3.4 ± 2.4        |
| Hillslope comparison            | Upland  | 2.9 ± 2.0       | 2.7 ± 2.1        |
|                                 | Lowland | 3.5 ± 2.3       | 2.7 ± 2.2        |
| Total                           |         | 3.3 ± 2.2       | 2.7 ± 2.1        |

\*No significant difference in mean height between protected and accessible areas ( $P < .05$ ;  $t$  test;  $n = 27,000$ ).

"Protected" and "accessible" indicate portions of the landscape without and with herbivore activity, respectively. Canopy height values are the mean canopy height ± SD derived from airborne laser returns.
